# Supplementary material
Source: HighWire-hosted journal article supplement (http://rc.rcjournal.com/highwire/filestream/16359/field_highwire_adjunct_files/1/suppl_2.pdf)
Supplement: suppl_2.pdf [file suppl_2.pdf]

**Appendix 2 Supplementary material: Comfort and satisfaction scores registered by caregivers (4 patients, 26 nebulizations).**

|           | Nebulizer | CBS Before-nebulization | VAS Before-nebulization | CBS During-nebulization | VAS During-nebulization | CBS After-nebulization | VAS After-nebulization | Satisfaction-NRS |
|-----------|-----------|-------------------------|-------------------------|-------------------------|-------------------------|------------------------|------------------------|------------------|
| Patient 1 | NHF       | 6                       | 10                      | 6                       | 10                      | 6                      | 10                     | 4                |
|           | JN        | 6                       | 10                      | 9                       | 8                       | 14                     | 7                      | 3                |
|           | NHF       | 6                       | 10                      | 6                       | 10                      | 6                      | 10                     | 4                |
|           | JN        | 10                      | 8                       | 13                      | 7                       | 19                     | 5                      | 1                |
|           | NHF       | 6                       | 10                      | 6                       | 10                      | 6                      | 10                     | 4                |
|           | JN        | 6                       | 10                      | 14                      | 6                       | 12                     | 7                      | 2                |
|           | NHF       | 6                       | 10                      | 7                       | 9                       | 6                      | 10                     | 4                |
|           | JN        | 22                      | 3                       | 25                      | 3                       | 14                     | 4                      | 1                |
|           | NHF       | 6                       | 10                      | 6                       | 10                      | 26                     | 2                      | 3                |
|           | NHF       | 10                      | 8                       | 12                      | 9                       | -                      | -                      | -                |
| Patient 2 | JN        | 10                      | 8                       | 23                      | 0                       | 15                     | 5                      | 1                |
|           | NHF       | 6                       | 9                       | 10                      | 7                       | 6                      | 9                      | 4                |
|           | JN        | 11                      | 10                      | 12                      | 8                       | 8                      | 10                     | 4                |
|           | NHF       | 10                      | 10                      | 12                      | 8                       | 8                      | 10                     | 4                |
| Patient 4 | JN        | 8                       | 10                      | 15                      | 0                       | 12                     | 8                      | -                |
|           | NHF       | 9                       | 8                       | 12                      | 9                       | -                      | -                      | -                |
|           | JN        | 13                      | 8                       | 19                      | 6                       | 14                     | 7                      | 1                |
|           | NHF       | 16                      | 7                       | 16                      | 7                       | 7                      | 9                      | 4                |
| Patient 5 | JN        | 17                      | 6                       | 16                      | 4                       | 10                     | 8                      | 3                |
|           | NHF       | 7                       | 9                       | 17                      | 9                       | 15                     | 9                      | 4                |
|           | JN        | 17                      | 5                       | 25                      | 3                       | 10                     | 6                      | 2                |
|           | NHF       | 6                       | 10                      | 11                      | 8                       | 18                     | 6                      | 4                |
|           | JN        | 12                      | 9                       | 17                      | 4                       | 14                     | 9                      | 2                |
|           | NHF       | 12                      | 9                       | 12                      | 8                       | 12                     | 8                      | 4                |
|           | JN        | 13                      | 8                       | 18                      | 4                       | 12                     | 8                      | 1                |
|           | NHF       | 10                      | 6                       | 8                       | 6                       | 6                      | 9                      | 4                |

NHF, nebulization system integrated in High-Flow nasal cannula; JN, jet nebulizer.

CBS, COMFORT-behaviour scale; VAS, visual analog scale; NRS, numeric rating scale.
